# Supplementary material
Source: ML conference proceedings conference paper supplement (https://aclanthology.org/2021.inlg-1.19)
Supplement: Supplementary_Attachment [file 2021.inlg-1.19.Supplementary_Attachment.zip]

**Script Name:** Roadside Improvised Explosive Device Attack

1. Movement.Transportation  
(Example: "Taliban transported explosives in car to centre place.")
2. Conflict.Attack.DetonateExplode  
(Example: "Someone detonated ied explosive device at ghazni place.")
3. Conflict.Attack  
(Example: "Group attacked convoy using explosive.")
4. Life.Injure  
(Example: "861 was injured by contractor using explosive.")
5. ArtifactExistence.DamageDestroyDisableDismantle.Damage  
(Example: "Someone damaged vehicle.")
6. ArtifactExistence.ManufactureAssemble  
(Example: "Someone manufactured or assembled or produced weapons.")
7. Life.Die  
(Example: "Members died, killed by efps killer.")
8. Justice.TrialHearing  
(Example: "Someone tried someone before dunford court or judge.")
