# Supplementary material
Source: ML conference proceedings conference paper supplement (https://aclanthology.org/2021.inlg-1.19)
Supplement: Supplementary_Attachment [file 2021.inlg-1.19.Supplementary_Attachment.zip]

**Script Name:** Drone-borne Improvised Explosive Device Attack

1. Contact.Contact.Broadcast  
(Example: "Its communicated to someone about some topic.")
2. Contact.ThreatenCoerce.Correspondence  
(Example: "Officers communicated remotely with someone about some topic.")
3. Cognitive.IdentifyCategorize.Unspecified  
(Example: "Some identified some as some at site place.")
4. Conflict.Demonstrate.Unspecified  
(Example: "Supporters was in a demonstration.")
5. ArtifactExistence.ManufactureAssemble.Unspecified  
(Example: "Ministry of defence manufactured or assembled or produced drones.")
6. Contact.RequestCommand.Unspecified  
(Example: "Houthis communicated with targets about some topic.")
7. Movement.Transportation.Unspecified  
(Example: "Immigrants transported immigrants in drone from colombia place to brazil place.")
8. Contact.Contact.Correspondence  
(Example: "Someone communicated remotely with witnesses about some topic.")
9. Disaster.Crash.Unspecified  
(Example: "Some person in drone vehicle crashed into something.")
10. Cognitive.Inspection.SensoryObserve  
(Example: "Forces observed targets in areas place.")
11. Life.Injure.Unspecified  
(Example: "People was injured by cia using drone.")
12. Conflict.Attack.Unspecified  
(Example: "Shinzo abe attacked no one using drone.")
13. Transaction.ExchangeBuySell.Unspecified  
(Example: "Military bought, sold, or traded drones to forces.")
14. ArtifactExistence.DamageDestroyDisableDismantle.Damage  
(Example: "Someone damaged infrastructure in buqyaq place.")
15. ArtifactExistence.DamageDestroyDisableDismantle.Destroy  
(Example: "Someone destroyed towers in abqaiq place.")
16. Conflict.Attack.DetonateExplode  
(Example: "Someone detonated or exploded charges explosive device at platform place.")
17. Life.Die.Unspecified  
(Example: "Child died at base place, killed by us killer.")
18. Justice.ArrestJailDetain.Unspecified  
(Example: "Officials arrested or jailed pilots.")
19. ArtifactExistence.DamageDestroyDisableDismantle.Unspecified  
(Example: "Someone damaged or destroyed uavs in elsewhere place.")
20. Justice.TrialHearing.Unspecified  
(Example: "Someone tried someone before tsj court or judge.")
