# Supplementary material
Source: ML conference proceedings conference paper supplement (https://aclanthology.org/2021.inlg-1.19)
Supplement: Supplementary_Attachment [file 2021.inlg-1.19.Supplementary_Attachment.zip]

**Script Name:** Car Bombing Improvised Explosive Device Attack

1. Personnel.StartPosition.Unspecified  
(Example: "K . radhakrishnan ips started working at police organization.")
2. Conflict.Demonstrate.Unspecified  
(Example: "Bomber was in a demonstration.")
3. Conflict.Demonstrate.DemonstrateWithViolence  
(Example: "Personnel was in a demonstration involving violence.")
4. Contact.RequestCommand.Broadcast  
(Example: "Police communicated to citizens about some topic.")
5. Disaster.Crash.Unspecified  
(Example: "Some person in driver vehicle crashed into building.")
6. Contact.ThreatenCoerce.Broadcast  
(Example: "Insurgents communicated to someone about some topic.")
7. Contact.ThreatenCoerce.Unspecified  
(Example: "Insurgents communicated with them about some topic.")
8. Cognitive.Inspection.SensoryObserve  
(Example: "Csiro observed it in usa place.")
9. Cognitive.IdentifyCategorize.Unspecified  
(Example: "24 identified victims as eric robert rudolph at field place.")
10. Contact.RequestCommand.Unspecified  
(Example: "Someone communicated with victims about some topic.")
11. Life.Injure.Unspecified  
(Example: "Personnel was injured by bomber using an explosive - laden vehicle.")
12. Conflict.Attack.DetonateExplode  
(Example: "Bomber detonated or exploded bomb explosive device using car to attack building.")
13. Contact.Contact.Broadcast  
(Example: "Agency communicated to victims about some topic.")
14. Personnel.EndPosition.Unspecified  
(Example: "Director stopped working at oklahoma bombing investigation committee.")
15. ArtifactExistence.DamageDestroyDisableDismantle.Damage  
(Example: "Someone damaged vehicle.")
16. ArtifactExistence.DamageDestroyDisableDismantle.Dismantle  
(Example: "Isis dismantled ieds.")
17. Contact.Contact.Correspondence  
(Example: "Someone communicated remotely with police.")
18. Contact.Contact.Unspecified  
(Example: "Someone communicated with reporters about some topic.")
19. Justice.InvestigateCrime.Unspecified  
(Example: "Scotland yard investigated bombers.")
20. Transaction.ExchangeBuySell.Unspecified  
(Example: "Citizens bought, sold, or traded explosives to martyr.")

21. ArtifactExistence.DamageDestroyDisableDismantle.Unspecified  
(Example: "Police damaged or destroyed bomb.")
22. Justice.ReleaseParole.Unspecified  
(Example: "Hijackers court or judge released or paroled hostages in kuwait place.")
23. Medical.Intervention.Unspecified  
(Example: "It treater treated casualties patient at hospitals place.")
24. Movement.Transportation.Unspecified  
(Example: "Bomber transported lieutenant in ambulance to hospital place.")
25. Conflict.Attack.Unspecified  
(Example: "Terrorist attacked vehicles using car bomb at zone place.")
26. Control.ImpedeInterfereWith.Unspecified  
(Example: "Police impeded or interfered at site place.")
27. Justice.ChargeIndict.Unspecified  
(Example: "Fadlallah charged or indicted bomber.")
28. ArtifactExistence.DamageDestroyDisableDismantle.DisableDefuse  
(Example: "Someone disabled or defused explosive in banbridge place.")
29. ArtifactExistence.ManufactureAssemble.Unspecified  
(Example: "Committees manufactured or assembled or produced bomb from ammonium nitrate components using bomb.")
30. ArtifactExistence.DamageDestroyDisableDismantle.Destroy  
(Example: "Someone destroyed cars in site place.")
31. Contact.Contact.Meet  
(Example: "Someone met face-to-face with witnesses.")
32. Justice.Convict.Unspecified  
(Example: "Some court or judge convicted terrorists in old bailey place.")
33. Justice.ArrestJailDetain.Unspecified  
(Example: "Police arrested or jailed bombers at buildings place.")
34. Movement.Transportation.Evacuation  
(Example: "Some transported casualties in ambulances.")
35. Life.Die.Unspecified  
(Example: "People died at road place, killed by bomber killer.")
36. Justice.TrialHearing.Unspecified  
(Example: "Some tried terrorist before jury court or judge in northern ireland place.")
