# Supplementary material
Source: ML conference proceedings conference paper supplement (https://aclanthology.org/2021.inlg-1.19)
Supplement: Supplementary_Attachment [file 2021.inlg-1.19.Supplementary_Attachment.zip]

**Script Name:** Improvised Explosive Device Attack

1. GenericCrime.GenericCrime.GenericCrime  
(Example: "Fakki committed a crime .")
2. Conflict.Demonstrate.Unspecified  
(Example: "Hdp was in a demonstration.")
3. Contact.RequestCommand.Unspecified  
(Example: "Someone communicated with responders.")
4. Cognitive.IdentifyCategorize.Unspecified  
(Example: "Intelligence identified ibrahim hussein berro as bomber.")
5. Contact.Contact.Broadcast  
(Example: "Government communicated to police at westminster place .")
6. Cognitive.Inspection.SensoryObserve  
(Example: "Csiro observed it in usa place.")
7. Contact.Contact.Unspecified  
(Example: "Someone communicated with personnel at building place .")
8. Contact.Contact.Correspondence  
(Example: "Someone communicated remotely with gunmen.")
9. Conflict.Attack.DetonateExplode  
(Example: "Irish republican army detonated or exploded bombs explosive device.")
10. Disaster.Crash.Unspecified  
(Example: "Some person in vehicle crashed into something at town place.")
11. Medical.Intervention.Unspecified  
(Example: "8 treater treated survivors patient.")
12. Contact.Contact.Meet  
(Example: "Someone met face-to-face with victims.")
13. Transaction.ExchangeBuySell.Unspecified  
(Example: "Department of homeland security bought, sold, or traded weapons.")
14. Justice.Convict.Unspecified  
(Example: "Some court or judge convicted bomber.")
15. ArtifactExistence.DamageDestroyDisableDismantle.Dismantle  
(Example: "I dismantled bomb.")
16. ArtifactExistence.ManufactureAssemble.Unspecified  
(Example: "Who manufactured or assembled or produced centre from material using bomb.")
17. ArtifactExistence.DamageDestroyDisableDismantle.Damage  
(Example: "Someone damaged something using bomb.")
18. Justice.InvestigateCrime.Unspecified  
(Example: "Agencies investigated some crime in site place.")
19. Justice.ReleaseParole.Unspecified  
(Example: "Hijackers court or judge released someone.")
20. Control.ImpedeInterfereWith.Unspecified  
(Example: "Police impeded or interfered at site place.")

21. Conflict.Attack.Unspecified  
(Example: "Gathering attacked site using bombs.")
22. Life.Injure.Unspecified  
(Example: "One was injured by uvf using bomb.")
23. ArtifactExistence.DamageDestroyDisableDismantle.Unspecified  
(Example: "Experts damaged or destroyed devices in synagogue place.")
24. ArtifactExistence.DamageDestroyDisableDismantle.Destroy  
(Example: "Someone destroyed building using bomb.")
25. Movement.Transportation.Evacuation  
(Example: "Firemen transported injured.")
26. ArtifactExistence.DamageDestroyDisableDismantle.DisableDefuse  
(Example: "Someone disabled or defused bomb birmingham place.")
27. Justice.ChargeIndict.Unspecified  
(Example: "Someone charged or indicted someone before director of public prosecutions.")
28. Movement.Transportation.Unspecified  
(Example: "Guerrilla transported explosive in truck from point.")
29. Justice.Sentence.Unspecified  
(Example: "Some court or judge sentenced bomber.")
30. Justice.ArrestJailDetain.Unspecified  
(Example: "Police arrested or jailed terrorist.")
31. Life.Die.Unspecified  
(Example: "People died, killed by bomber killer.")
32. Justice.TrialHearing.Unspecified  
(Example: "Someone tried someone before democrats.")
