# Supplementary material
Source: ML conference proceedings conference paper supplement (https://aclanthology.org/2021.inlg-1.19)
Supplement: Supplementary_Attachment [file 2021.inlg-1.19.Supplementary_Attachment.zip]

**Script Name:** Backpack Improvised Explosive Device Attack

1. Cognitive.IdentifyCategorize.Unspecified  
(Example: "Officers identified suspects as suspect.")
2. Cognitive.Inspection.SensoryObserve  
(Example: "They observed something in structures place.")
3. Contact.Contact.Correspondence  
(Example: "Someone communicated remotely with police.")
4. Transaction.ExchangeBuySell.Unspecified  
(Example: "Someone bought, sold, or traded explosives.")
5. Conflict.Attack.DetonateExplode  
(Example: "Tamerlan detonated or exploded bomb explosive device at boston place.")
6. Movement.Transportation.Unspecified  
(Example: "Investigators transported people in a car to belt parkway place.")
7. Movement.Transportation.Evacuation  
(Example: "Police transported device.")
8. Conflict.Attack.Unspecified  
(Example: "Terrorist attacked people using bomb at front place.")
9. ArtifactExistence.DamageDestroyDisableDismantle.Damage  
(Example: "Someone damaged robot.")
10. Life.Injure.Unspecified  
(Example: "Hundreds was injured by who using bombs.")
11. Justice.ChargeIndict.Unspecified  
(Example: "Someone charged or indicted one.")
12. ArtifactExistence.DamageDestroyDisableDismantle.Destroy  
(Example: "Someone destroyed property using weapon instrument.")
13. ArtifactExistence.ManufactureAssemble.Unspecified  
(Example: "Bombers manufactured or assembled or produced something from explosives components.")
14. Justice.TrialHearing.Unspecified  
(Example: "Someone tried someone before judges in boston place.")
15. Justice.ArrestJailDetain.Unspecified  
(Example: "Someone arrested or jailed man at site place.")
16. Life.Die.Unspecified  
(Example: "Suspect died, killed by officer.")
